# Supplementary material for: Innate immune alterations are elicited in microglial cells before plaque deposition in the Alzheimer’s disease mouse model 5xFAD
Source: PubMed Central journal article supplement (PMC5784016; doi:10.1038/s41598-018-19699-y), 2018-01-24
Supplement: 41598_2018_19699_MOESM1_ESM.pdf [file 41598_2018_19699_MOESM1_ESM.pdf]

## **Innate immune alterations are elicited in microglial cells before plaque deposition in the Alzheimer's disease mouse model 5xFAD**

Antonio Boza-Serrano\*<sup>1</sup>, Yiyi Yang\*<sup>1</sup>, Agnes Paulus<sup>1</sup> and Tomas Deierborg<sup>1</sup>

Experimental Neuroinflammation Laboratory, Department of Experimental Medical Science, Lund University, Lund, Sweden.

Sölvegatan 19, BMC B11, 221 84 Lund, Sweden

Corresponding author: Antonio Boza-Serrano; [antonio.boza\\_serrano@med.lu.se](mailto:antonio.boza_serrano@med.lu.se)

Tomas Deierborg; [tomas.deierborg@med.lu.se](mailto:tomas.deierborg@med.lu.se)

\*Equal contribution to the paper

**Keywords:** inflammation, brain, Alzheimer's disease, innate immune system and microglia.

### **Supplementary Figure 1**

#### **Enrichment of microglia after CD11b microbeads isolation**

A) Bars show a relative comparison of microglia that were CD11b<sup>+</sup> and CD45<sup>+</sup> before and after CD11b microbeads isolation. There is a significant enrichment of microglia population after the isolation compared to before (Paired t-test, n = 4, P < 0.05, error bars with mean ± SEM).

(B-C) Representative contour plots of CD11b microbeads isolated cells stained with anti-CD11b-APC and anti-CD45-PE antibodies. Microglia were identified by double

positive for CD11b and CD45 staining. Only single and live cells were taken into consideration for the gating.

## A Microglial Enrichment

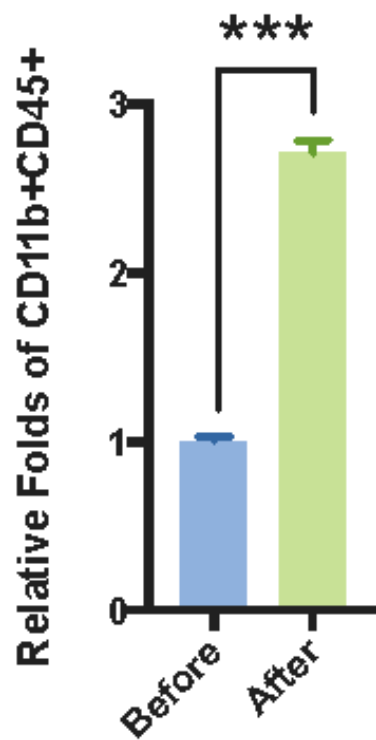

## B Before Isolation

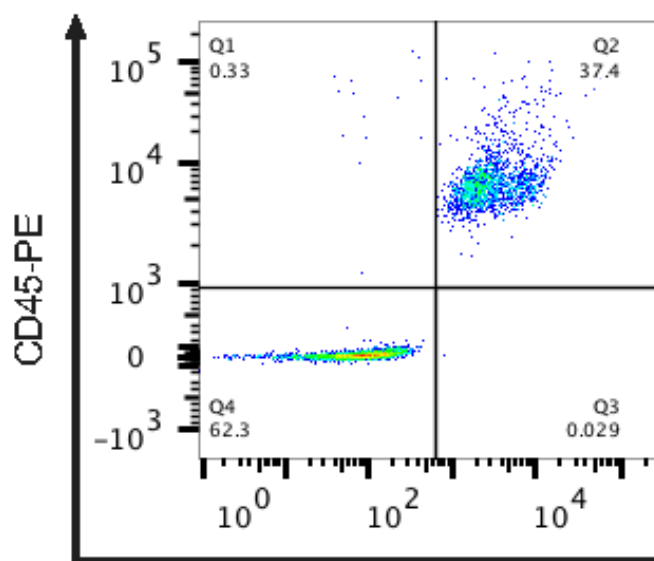

## C After Isolation

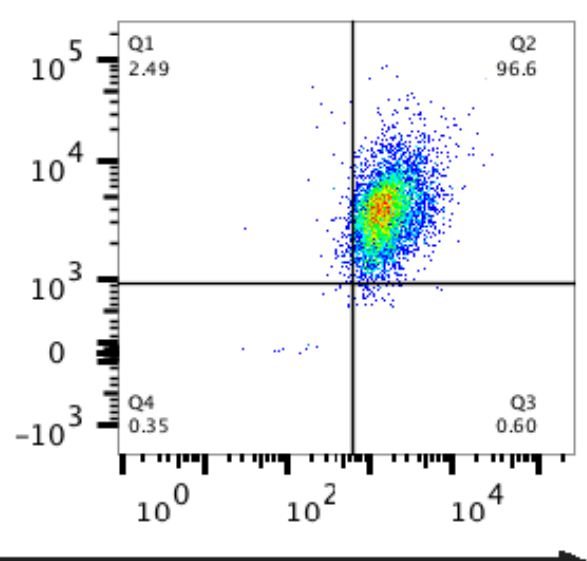

CD11b-APC
